# Supplementary material
Source: MDPI journal article supplement (https://www.mdpi.com/2073-4433/15/2/166)
Supplement: s1 [file s1]

# Analysis of Precipitation and Drought in the Main Southeastern Iberian River Headwaters (1952–2021)

María José Estrela <sup>1</sup>, David Corell <sup>1,\*</sup>, Juan Javier Miró <sup>1</sup> and Raquel Niclós <sup>2</sup>

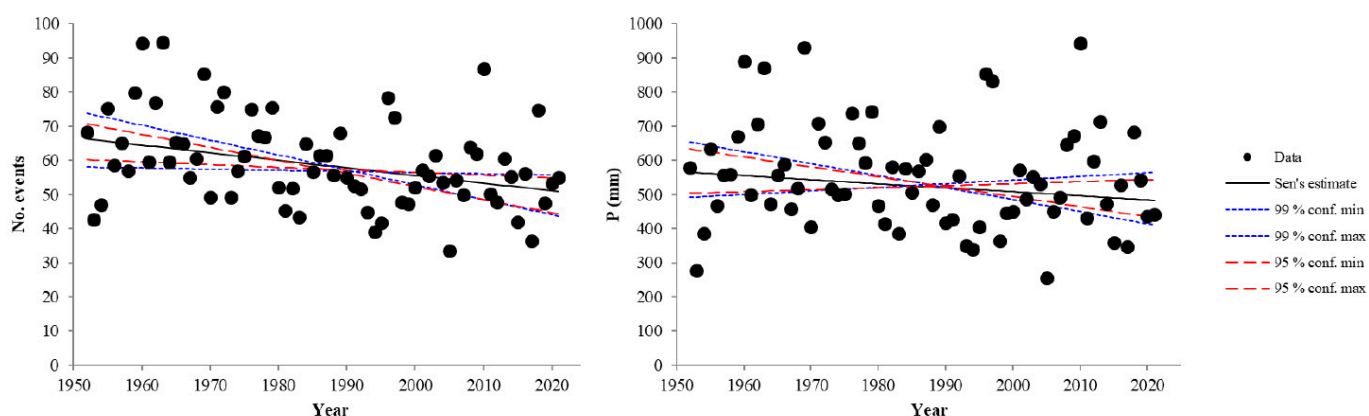

**Figure. S1:** Slopes (Sen) and confidence intervals (95–99%) for the average trend (1952–2021) in rainfall daily events of all the stations in the study area (on the left, the number of events; on the right, the average rainfall accumulated per station and year for these events).

## Stations with a negative change in precipitation greater than 40 mm/d between 1952–1986 and 1987–2021

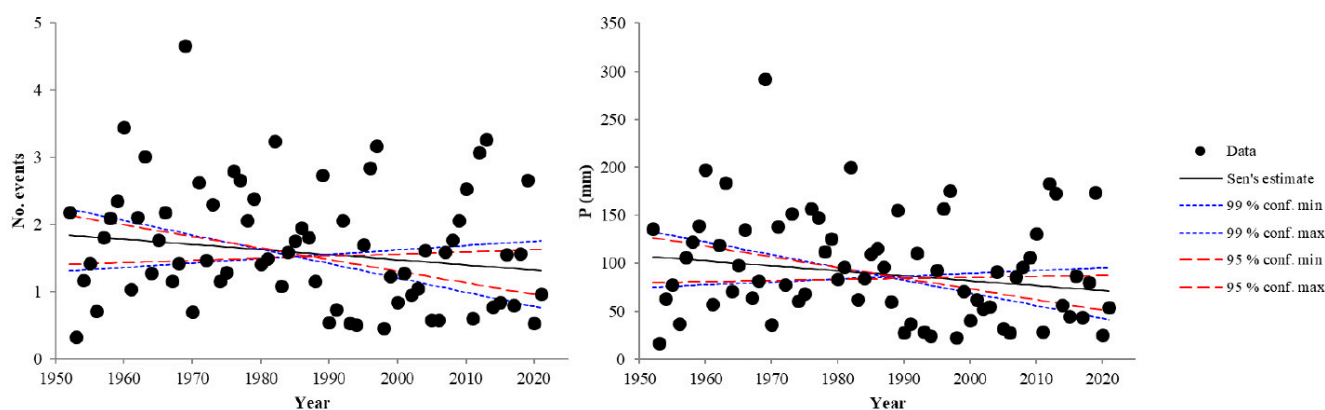

Stations with a positive change in precipitation greater than 40 mm/d between 1952-1986 and 1987-2021

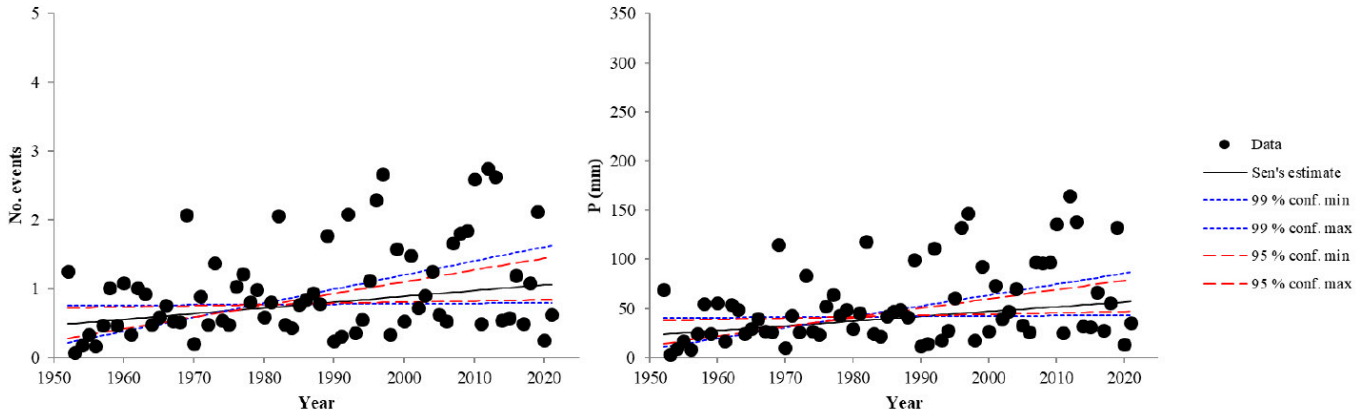

**Figure S2.** Top images: slopes (Sen) and confidence intervals (95–99%) for the average trend (1952–2021) in heavy ( $\geq 40$  mm/d) rainfall daily events of all the stations that according to Figure 9, showed a negative change between 1952–1986 and 1987–2021 (on the left, the number of events; on the right, the average rainfall accumulated per station and year for these events). Bottom images: same analysis using all the stations that according to Figure 9, showed a positive change between 1952–1986 and 1987–2021.

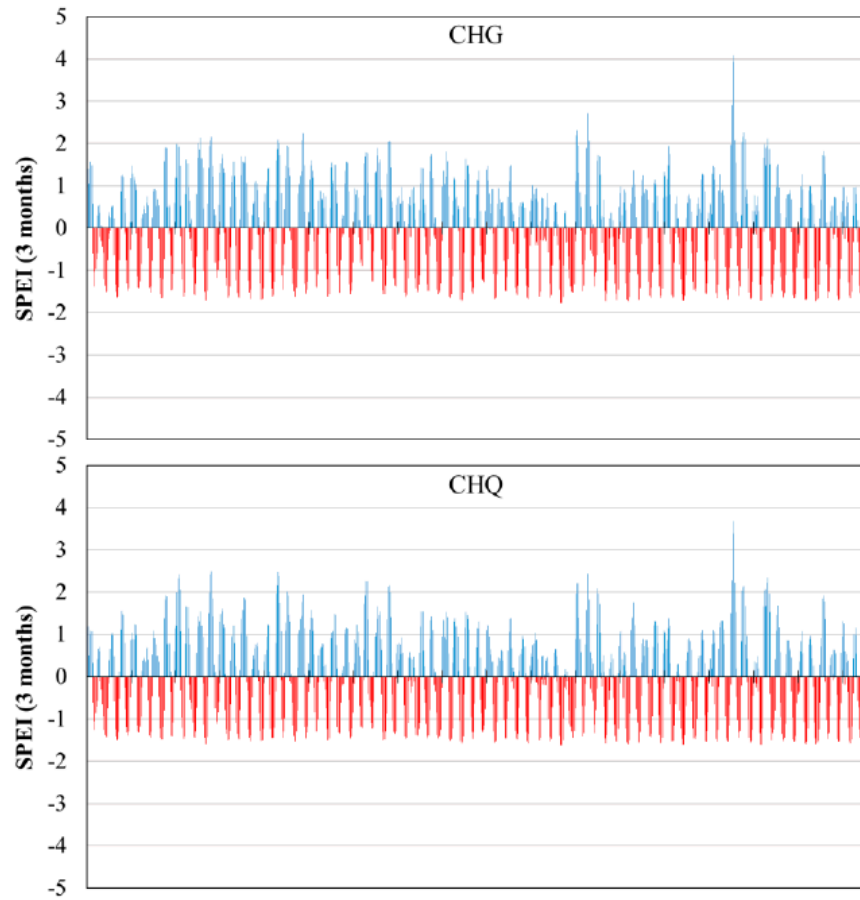

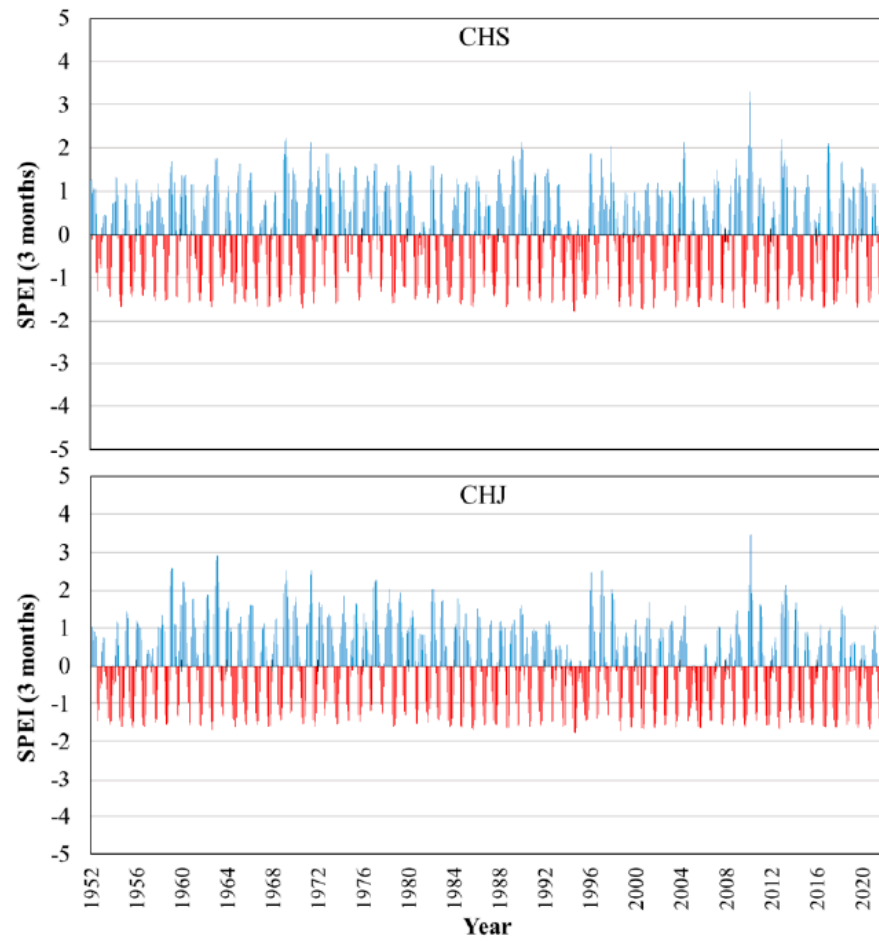

**Figure S3.** Time series of the average daily SPEI values over the 3-month time scale for 1952–2021 and the CHG, CHQ, CHS, and CHJ weather stations.
